# Supplementary material for: Rod–coil type miktoarm star copolymers consisting of polyfluorene and polylactide: precise synthesis and structure–morphology relationship
Source: Royal Society of Chemistry journal article supplement (doi:10.1039/c5py01031d), 2015-01-01
Supplement: c5py01031d1.pdf [file c5py01031d1.pdf]

## Electronic Supplementary Information

### Rod-Coil Type Miktoarm Star Copolymers Consisting of Polyfluorene and Polylactide: Precise Synthesis and Structure-Morphology Relationship<sup>‡</sup>

Kengo Saito,<sup>†</sup> Takuya Isono,<sup>†</sup> Han-Sheng Sun,<sup>¶</sup> Toyoji Kakuchi,<sup>†</sup> Wen-Chang Chen,<sup>¶,\*</sup> Toshifumi

Satoh<sup>†,\*</sup>

<sup>†</sup>Graduate School of Chemical Sciences and Engineering and Division of Applied Chemistry, Faculty  
of Engineering, Hokkaido University, Sapporo 060-8628, Japan

<sup>¶</sup>Department of Chemical Engineering, National Taiwan University, Taipei 10617, Taiwan

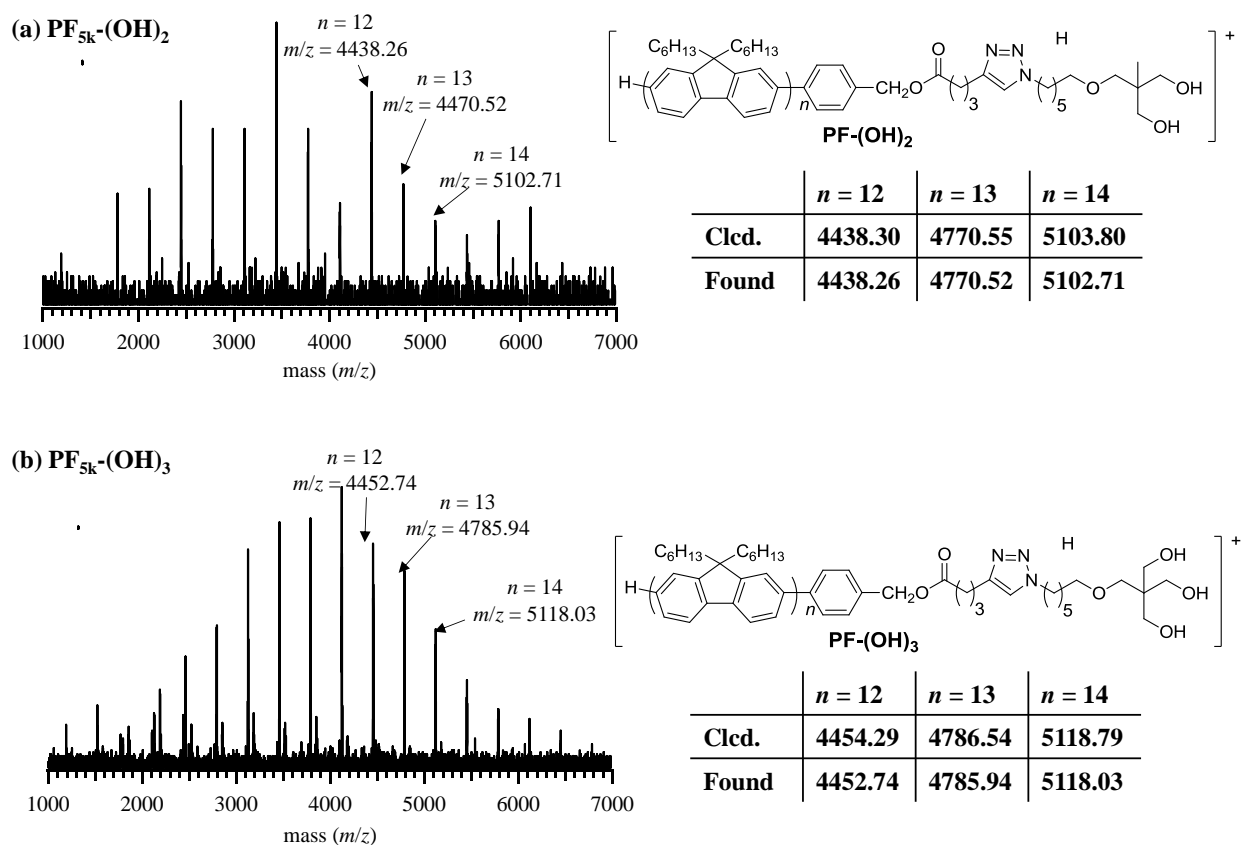

**Figure S1.** MALDI-TOF MS spectral analysis of (a) PF<sub>5k</sub>-(OH)<sub>2</sub> ( $M_{n,NMR} = 5500 \text{ g mol}^{-1}$ ,  $D = 1.22$ ), and (b) PF<sub>5k</sub>-(OH)<sub>3</sub> ( $M_{n,NMR} = 5500 \text{ g mol}^{-1}$ ,  $D = 1.21$ ).

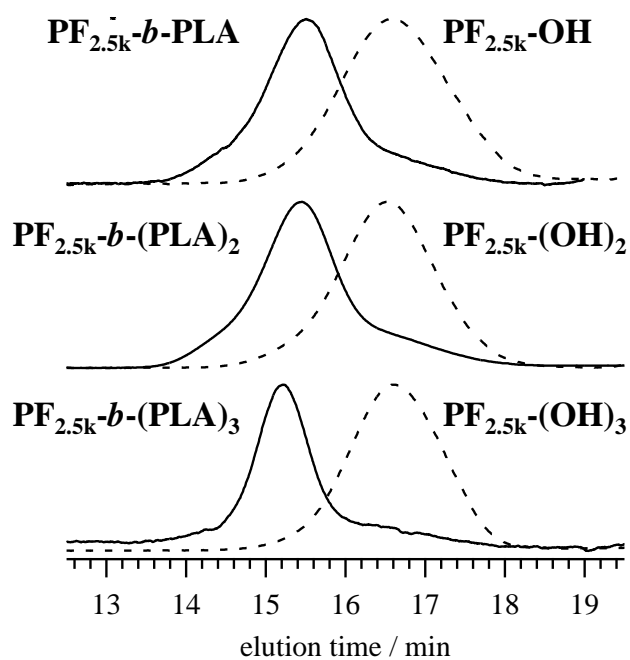

**Figure S2.** SEC traces of  $\text{PF}_{2.5\text{k}}\text{-}b\text{-}(\text{PLA})_x\text{S}$  ( $x = 1, 2,$  and  $3$ ; solid curves) and the corresponding macroinitiators,  $\text{PF}_{2.5\text{k}}\text{-}(\text{OH})_x\text{S}$  ( $x = 1, 2,$  and  $3$ ; broken curves).

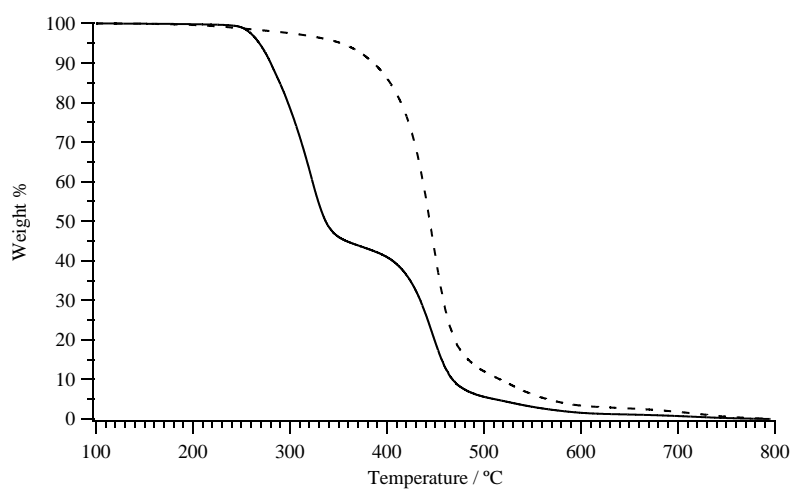

**Figure S3.** TGA profiles of  $\text{PF}_{5\text{k}}\text{-}b\text{-PLA}$  (solid line) and  $\text{PF}_{5\text{k}}\text{-OH}$  (broken line).

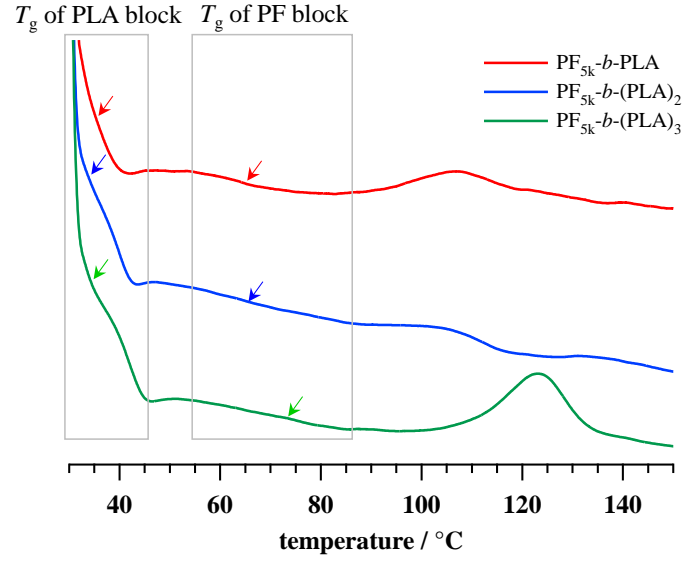

**Figure S4.** Typical DSC profiles during second heating of  $PF_{5k}-b-PLA$ ,  $PF_{5k}-b-(PLA)_2$ , and  $PF_{5k}-b-(PLA)_3$ .

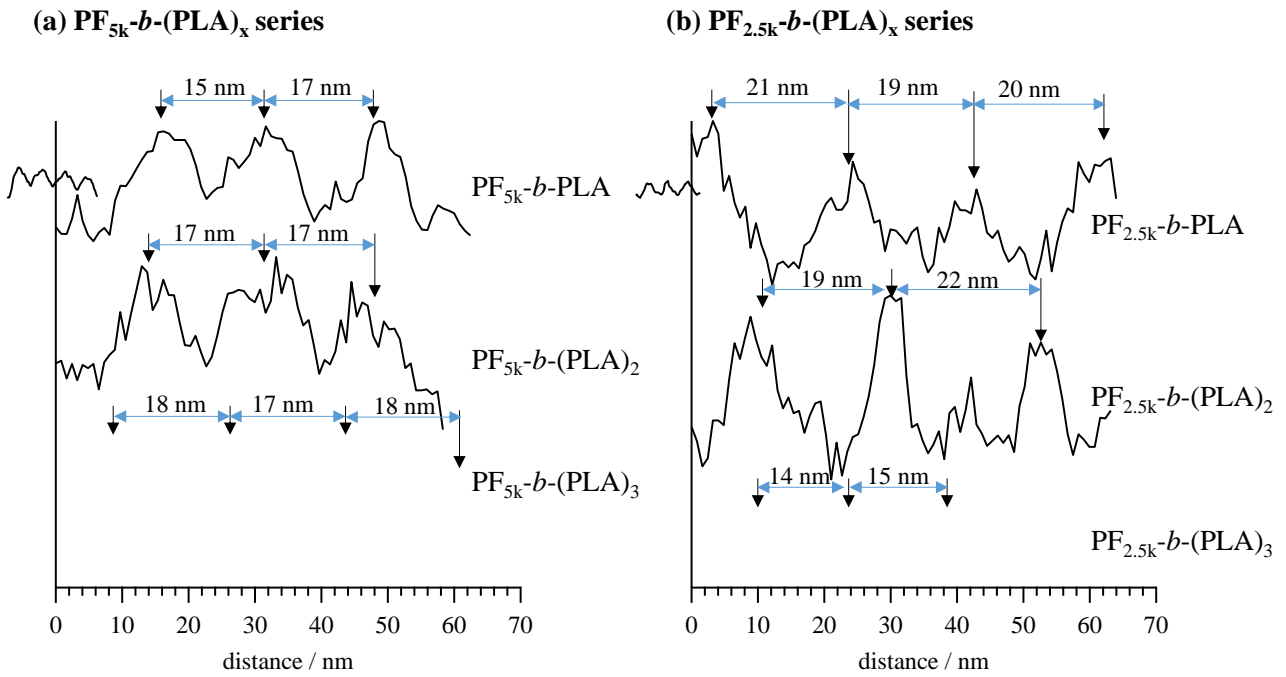

**Figure S5.** Typical contrast profiles for the TEM images of  $PF-b-(PLA)_x$  samples.
